# Supplementary material for: Highly sensitive multifunctional recyclable Ag–TiO2nanorod SERS substrates for photocatalytic degradation and detection of dye molecules
Source: Royal Society of Chemistry journal article supplement (doi:10.1039/c6ra06163j), 2016-01-01
Supplement: c6ra06163j1.pdf [file c6ra06163j1.pdf]

Supporting Information to:

Highly sensitive multifunctional recyclable Ag-TiO<sub>2</sub> nanorods SERS substrates  
for photocatalytic degradation and detection of dye molecules

Samir Kumar, Devesh K. Lodhi and J. P. Singh<sup>\*</sup>

*Department of Physics, Indian Institute of Technology Delhi, Hauz Khas, New Delhi 110016, India.*

*<sup>\*</sup>E-mail: jpsingh@physics.iitd.ac.in*

<sup>†</sup>Both the authors DKL and SK contributed equally.

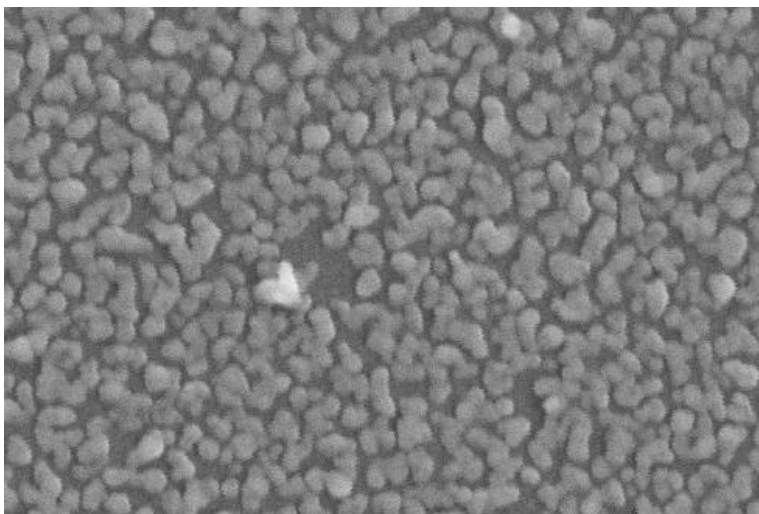

*Figure S1: SEM image of silver island deposition on the TiO<sub>2</sub> thin film showing the silver nucleation formation on the TiO<sub>2</sub> thin film. The nucleation's are of abrupt shape and completely different and larger in size in comparison to the silver nucleation on the silver nanorods.*

The SERS detection of Rhodamine 6G dye has been done on these samples as shown in Fig S2. The enhancement factor in the case of Ag-TiO<sub>2</sub> thin film was found to be 15 % of Ag-TiO<sub>2</sub> nanorods. The reason behind the small enhancement in case of Ag-TiO<sub>2</sub> thin film may be because of the lower density and larger size of the silver nucleation.

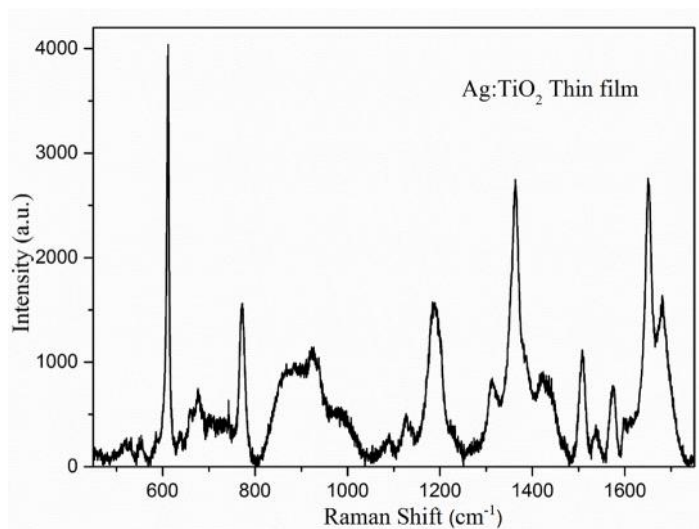

Figure S2: Raman spectra of Rhodamine 6G dye on the Ag-TiO<sub>2</sub> thin film samples. Clearly, the sensitivity of Ag-TiO<sub>2</sub> thin film substrates is less than that of Ag-TiO<sub>2</sub> nanorods substrates.

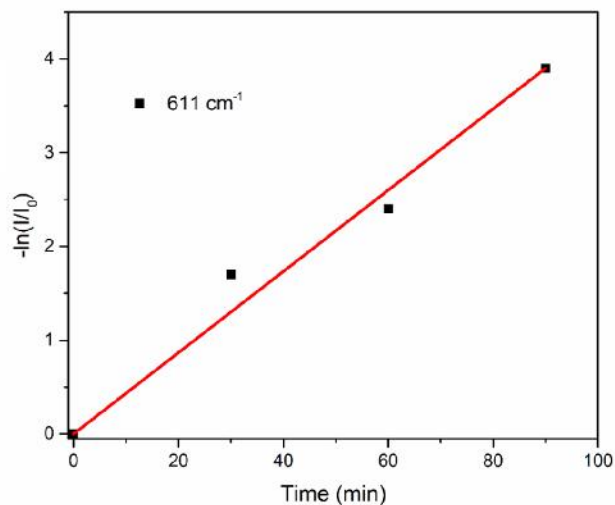

Figure S3: Linear relationship of  $-\ln(I/I_0)$  versus reaction time acquired from 611 cm<sup>-1</sup>SERS bands
